# Supplementary material for: Microplastic deposition velocity in streams follows patterns for naturally occurring allochthonous particles
Source: PubMed Central journal article supplement (PMC6403300; doi:10.1038/s41598-019-40126-3), 2019-03-06
Supplement: 41598_2019_40126_MOESM1_ESM.pdf [file 41598_2019_40126_MOESM1_ESM.pdf]

1 **Supplemental Information**

2 Microplastic deposition velocity in streams follows patterns

3 for naturally occurring allochthonous particles

4

5

6 Timothy J. Hoellein<sup>1\*</sup>, Ariel J. Shogren<sup>2,3</sup>, Jennifer L. Tank<sup>2</sup>, Paul Risteca<sup>1</sup> John J. Kelly<sup>1</sup>

7

8 <sup>1</sup>Dept. Biology, Loyola Univ. Chicago, 1032 W Sheridan Rd, Chicago IL, USA 60660.

9 <sup>2</sup>Dept. Biological Sciences, Univ. of Notre Dame, Notre Dame, IN, USA 46556

10 <sup>3</sup>*Current address:* Dept. Earth and Env. Sci., Michigan State Univ., 306 Natural Sci. Bldg. East

11 Lansing, MI 48824

12 \**Corresponding author.* Phone: 773-508-8859, Fax: 773-508-5636, email: [thoellein@luc.edu](mailto:thoellein@luc.edu)

13 Supplemental Table 1. Physical characteristics of the three study reaches of the experimental  
 14 stream. Discharge (Q), width (w), depth (z), water velocity (V), and slope (S) were measured.  
 15 Hydraulic radius (R) =  $(w*z)/w$ , shear stress =  $\rho gRS$  (where  $\rho$  = density of water at 10°C, g =  
 16 gravitational constant), Reynolds number (Re) =  $(V*z)/\nu$  (where  $\nu$ =kinematic viscosity of water  
 17 at 10°C), and Froude number =  $V/[(g*z)^{0.5}]$ .

|                                  | Reach 1 | Reach 2 | Reach 3 |
|----------------------------------|---------|---------|---------|
| discharge (L/s)                  | 1.45    | 1.43    | 1.35    |
| width (m)                        | 0.458   | 0.460   | 0.462   |
| depth (m)                        | 0.039   | 0.036   | 0.033   |
| velocity (m/s)                   | 0.082   | 0.087   | 0.090   |
| hydraulic radius (m)             | 0.039   | 0.036   | 0.033   |
| slope (m/m)                      | 0.010   | 0.010   | 0.010   |
| shear stress (N/m <sup>2</sup> ) | 3.70    | 3.41    | 3.12    |
| Reynolds number                  | 2435    | 2389    | 2248    |
| Froude number                    | 0.134   | 0.148   | 0.159   |

18 Supplemental Table 2. Meta-analysis of particle deposition velocity ( $v_{dep}$ ) and diameter in  
 19 streams. The \* in the diameter column indicates longest axis rather than diameter which was  
 20 used for the last 4 particles on the table. Abbreviations: LFPOM = large fine particulate organic  
 21 matter, MFPOM = medium fine particulate organic matter. SFPOM = small fine particulate  
 22 organic matter, FPOM = fine particulate organic matter, VFPOM, very fine particulate organic  
 23 matter, UFPOM = ultra-fine particulate organic matter.

| Particle type | Diameter<br>( $\mu\text{m}$ ) | vdep<br>(mm/s) | Citation                |
|---------------|-------------------------------|----------------|-------------------------|
| LFPOM         | 280                           | 4.3            | Kazmierczak et al. 1987 |
| MFPOM         | 105                           | 2.8            | Kazmierczak et al. 1987 |
| SFPOM         | 43                            | 1.7            | Kazmierczak et al. 1987 |
| FPOM          | 24                            | 0.8            | Kazmierczak et al. 1987 |
| VFPOM         | 10                            | 0.7            | Kazmierczak et al. 1987 |
| UFPOM         | 0.05                          | 0.6            | Kazmierczak et al. 1987 |
| FPOM          | 77.5                          | 1.7            | Cushing et al. 1993     |
| FPOM          | 77.5                          | 1.0            | Cushing et al. 1993     |
| FPOM          | 77.5                          | 1.8            | Cushing et al. 1993     |
| Yeast         | 5.8                           | 0.031          | Paul & Hall 2002        |
| Bacteria      | 2.0                           | 0.093          | Hall et al. 1996        |
| VFPOM         | 26.7                          | 0.031          | Hunken and Mutz 2007    |
| VFPOM         | 26.7                          | 0.111          | Hunken and Mutz 2007    |
| VFPOM         | 26.7                          | 0.231          | Hunken and Mutz 2007    |
| VFPOM         | 26.7                          | 0.075          | Hunken and Mutz 2007    |
| VFPOM         | 26.7                          | 0.153          | Hunken and Mutz 2007    |
| VFPOM         | 26.7                          | 0.053          | Hunken and Mutz 2007    |
| VFPOM         | 26.7                          | 0.253          | Hunken and Mutz 2007    |
| VFPOM         | 26.7                          | 0.242          | Hunken and Mutz 2007    |
| VFPOM         | 26.7                          | 0.078          | Hunken and Mutz 2007    |
| VFPOM         | 26.7                          | 0.039          | Hunken and Mutz 2007    |
| VFPOM         | 26.7                          | 0.036          | Hunken and Mutz 2007    |
| VFPOM         | 26.7                          | 0.094          | Hunken and Mutz 2007    |
| VFPOM         | 26.7                          | 0.186          | Hunken and Mutz 2007    |
| VFPOM         | 26.7                          | 0.342          | Hunken and Mutz 2007    |
| VFPOM         | 26.7                          | 0.114          | Hunken and Mutz 2007    |
| VFPOM         | 26.7                          | 0.069          | Hunken and Mutz 2007    |
| VFPOM         | 26.7                          | 0.067          | Hunken and Mutz 2007    |

|             |      |        |                        |
|-------------|------|--------|------------------------|
| VFPOM       | 26.7 | 0.100  | Huncken and Mutz 2007  |
| Pollen      | 87   | 0.311  | Miller & Georgian 1992 |
| Pollen      | 87   | 0.305  | Miller & Georgian 1992 |
| Pollen      | 87   | 0.263  | Miller & Georgian 1992 |
| Pollen      | 87   | 0.313  | Georgian et al. 2003   |
| Pollen      | 87   | 0.146  | Georgian et al. 2003   |
| Pollen      | 87   | 0.094  | Georgian et al. 2003   |
| Pollen      | 87   | 0.12   | Georgian et al. 2003   |
| FPOM        | 53   | 0.244  | Georgian et al. 2003   |
| FPOM        | 53   | 0.16   | Georgian et al. 2003   |
| FPOM        | 53   | 0.0514 | Georgian et al. 2003   |
| FPOM        | 53   | 0.25   | Georgian et al. 2003   |
| FPOM        | 53   | 0.052  | Newbold et al. 2005    |
| FPOM        | 53   | 0.03   | Newbold et al. 2005    |
| FPOM        | 53   | 0.15   | Newbold et al. 2005    |
| VFPOM       | 15   | 0.047  | Newbold et al. 2005    |
| VFPOM       | 15   | 0.041  | Newbold et al. 2005    |
| VFPOM       | 15   | 0.078  | Newbold et al. 2005    |
| Glass Beads | 78   | 0.643  | Ehrman et al. 1994     |
| Pollen      | 87   | 1.26   | Ehrman et al. 1994     |
| FPOM        | 53   | 0.87   | Minshall et al 2000    |
| FPOM        | 53   | 0.24   | Minshall et al 2000    |
| FPOM        | 53   | 0.17   | Minshall et al 2000    |
| FPOM        | 53   | 0.06   | Minshall et al 2000    |
| FPOM        | 53   | 0.26   | Minshall et al 2000    |
| FPOM        | 53   | 0.83   | Minshall et al 2000    |
| FPOM        | 53   | 0.14   | Minshall et al 2000    |
| FPOM        | 53   | 0.07   | Minshall et al 2000    |
| FPOM        | 53   | 1.1    | Thomas et al. 2001     |
| FPOM        | 53   | 0.24   | Thomas et al. 2001     |
| VFPOM       | 15   | 1.09   | Thomas et al. 2001     |
| VFPOM       | 15   | 0.16   | Thomas et al. 2001     |
| MPOM        | 107  | 0.53   | Thomas et al. 2001     |
| Diatoms     | 15   | 0.99   | Thomas et al. 2001     |
| FPOM        | 53   | 0.63   | Thomas et al. 2001     |
| FPOM        | 53   | 1.1    | Thomas et al. 2001     |
| FPOM        | 53   | 0.24   | Thomas et al. 2001     |
| FPOM        | 53   | 0.17   | Thomas et al. 2001     |
| FPOM        | 53   | 0.34   | Thomas et al. 2001     |
| FPOM        | 53   | 1.03   | Thomas et al. 2001     |
| FPOM        | 53   | 0.62   | Thomas et al. 2001     |

|                       |          |       |                             |
|-----------------------|----------|-------|-----------------------------|
| VFPOM                 | 15       | 0.43  | Thomas et al. 2001          |
| VFPOM                 | 15       | 1.09  | Thomas et al. 2001          |
| VFPOM                 | 15       | 0.16  | Thomas et al. 2001          |
| VFPOM                 | 15       | 0.11  | Thomas et al. 2001          |
| VFPOM                 | 15       | 0.13  | Thomas et al. 2001          |
| VFPOM                 | 15       | 0.42  | Thomas et al. 2001          |
| VFPOM                 | 15       | 0.43  | Thomas et al. 2001          |
| Spores                | 42       | 0.05  | Wanner & Pusch 2000         |
| Yeast                 | 7        | 0.08  | Shogren et al. (unpub data) |
| Yeast                 | 7        | 0.04  | Shogren et al. (unpub data) |
| Yeast                 | 7        | 0.01  | Shogren et al. (unpub data) |
| Pollen                | 70       | 0.12  | Shogren et al. (unpub data) |
| Pollen                | 70       | 0.44  | Shogren et al. (unpub data) |
| Pollen                | 70       | 0.4   | Shogren et al. (unpub data) |
| Pollen                | 70       | 0.23  | Shogren et al. (unpub data) |
| Pollen                | 54       | 0.313 | Webster et al. 1999         |
| Glass beads           | 78       | 3.97  | Webster et al. 1999         |
| FPOM                  | 43       | 1.19  | Webster et al. 1988         |
| Pellets               | 3,000    | 0.28  | This study                  |
| Fragment              | 1,500    | 1.08  | This study                  |
| Fiber                 | 1,500*   | 0.46  | This study                  |
| Stick                 | 460,000* | 3.784 | Cordova et al. 2008         |
| Pine needle           | 100,000* | 5.858 | Cordova et al. 2008         |
| <i>G. biloba</i> leaf | 53,000*  | 4.016 | Cordova et al. 2008         |

---

24 Supplemental Table 3. Results for the deposition measurements for all of the particle releases  
 25 conducted during the study. Abbreviations:  $S_w$  = transport length,  $v_{dep}$  = deposition velocity,  $v_{fall}$   
 26 = sinking velocity, and N/A = not applicable because  $v_{fall} = 0$  for polypropylene pellets.

|                | Particle | biofilm | Slope  | $R^2$ | $S_w$ (m) | $v_{dep}$ (mm/s) | $v_{dep}/v_{fall}$ |
|----------------|----------|---------|--------|-------|-----------|------------------|--------------------|
| <i>Reach 1</i> |          |         |        |       |           |                  |                    |
| Release 1      | Pellet   | yes     | -0.091 | 1.00  | 11.0      | 0.277            | (N/A)              |
| Release 2      | Fragment | yes     | -0.310 | 1.00  | 3.2       | 0.948            | 0.061              |
| Release 3      | Fiber    | yes     | -0.122 | 0.99  | 8.2       | 0.372            | 0.030              |
| Release 4      | Pellet   | no      | -0.026 | 1.00  | 38.3      | 0.085            | (N/A)              |
| Release 5      | Fragment | no      | -0.152 | 0.94  | 6.6       | 0.497            | 0.032              |
| Release 6      | Fiber    | no      | -0.190 | 0.99  | 5.3       | 0.624            | 0.050              |
| <i>Reach 2</i> |          |         |        |       |           |                  |                    |
| Release 7      | Pellet   | yes     | -0.155 | 1.00  | 6.5       | 0.452            | (N/A)              |
| Release 8      | Fragment | yes     | -0.760 | 1.00  | 1.3       | 2.220            | 0.142              |
| Release 9      | Fiber    | yes     | -0.181 | 0.97  | 5.5       | 0.530            | 0.042              |
| Release 10     | Pellet   | no      | -0.070 | 1.00  | 14.4      | 0.203            | (N/A)              |
| Release 11     | Fragment | no      | -0.273 | 1.00  | 3.7       | 0.797            | 0.051              |
| Release 12     | Fiber    | no      | -0.140 | 0.93  | 7.2       | 0.408            | 0.033              |
| <i>Reach 3</i> |          |         |        |       |           |                  |                    |
| Release 13     | Pellet   | yes     | -0.143 | 1.00  | 7.0       | 0.375            | (N/A)              |
| Release 14     | Fragment | yes     | -0.375 | 0.93  | 2.7       | 0.986            | 0.063              |
| Release 15     | Fiber    | yes     | -0.141 | 0.97  | 7.1       | 0.371            | 0.030              |
| Release 16     | Pellet   | no      | -0.087 | 0.98  | 11.5      | 0.282            | (N/A)              |
| Release 17     | Fragment | no      | -0.310 | 0.83  | 3.2       | 1.008            | 0.065              |
| Release 18     | Fiber    | no      | -0.144 | 1.00  | 6.9       | 0.468            | 0.037              |

27 **Supplemental Figure legends.**

28 Supplemental Figure 1. Image of particle transport in the experimental stream. This image was  
29 taken 40 seconds after a pellet release, 10 m downstream of the release point. These images were  
30 collected every 5 seconds and were used to measure particle transport as described in methods.

31  
32 Supplemental Figure 2. Particle counts for microplastic transport at collection sites located 5, 10,  
33 and 15 m from the particle release location, according to time since particle released. (A) pellets,  
34 (B) fragments, and (C) fibers. Transport length is calculated from the slope of the regression line,  
35 generated from the conservative tracer (conductivity) and microplastic that passed by distance  
36 from the microplastic release point (i.e., natural log of microplastic/conductivity), (D) pellets, (E)  
37 fragments, and (F) fibers.

38  
39 Supplemental Figure 3. The synthesis of particle transport first developed by Georgian et al.  
40 (2003) showing the relationship between (A) settling velocity ( $v_{\text{fall}}$ ) and (B) deposition velocity  
41 ( $v_{\text{dep}}$ ) relative to particle diameter (log transformed), for data collected in flowing waters. We  
42 added data for microplastic fragments and fibers collected in this study (gray), as well as results  
43 from Hunken and Mutz (2007) and Cushing et al. (1993). In (A),  $v_{\text{fall}}$  for fibers and fragments  
44 was presented only for non-biofilm colonized particles. In (B),  $v_{\text{dep}}$  was measured for  
45 microplastic with and without biofilm colonization. Results for linear regression between log-  
46 transformed axes are shown in the upper left of each panel.

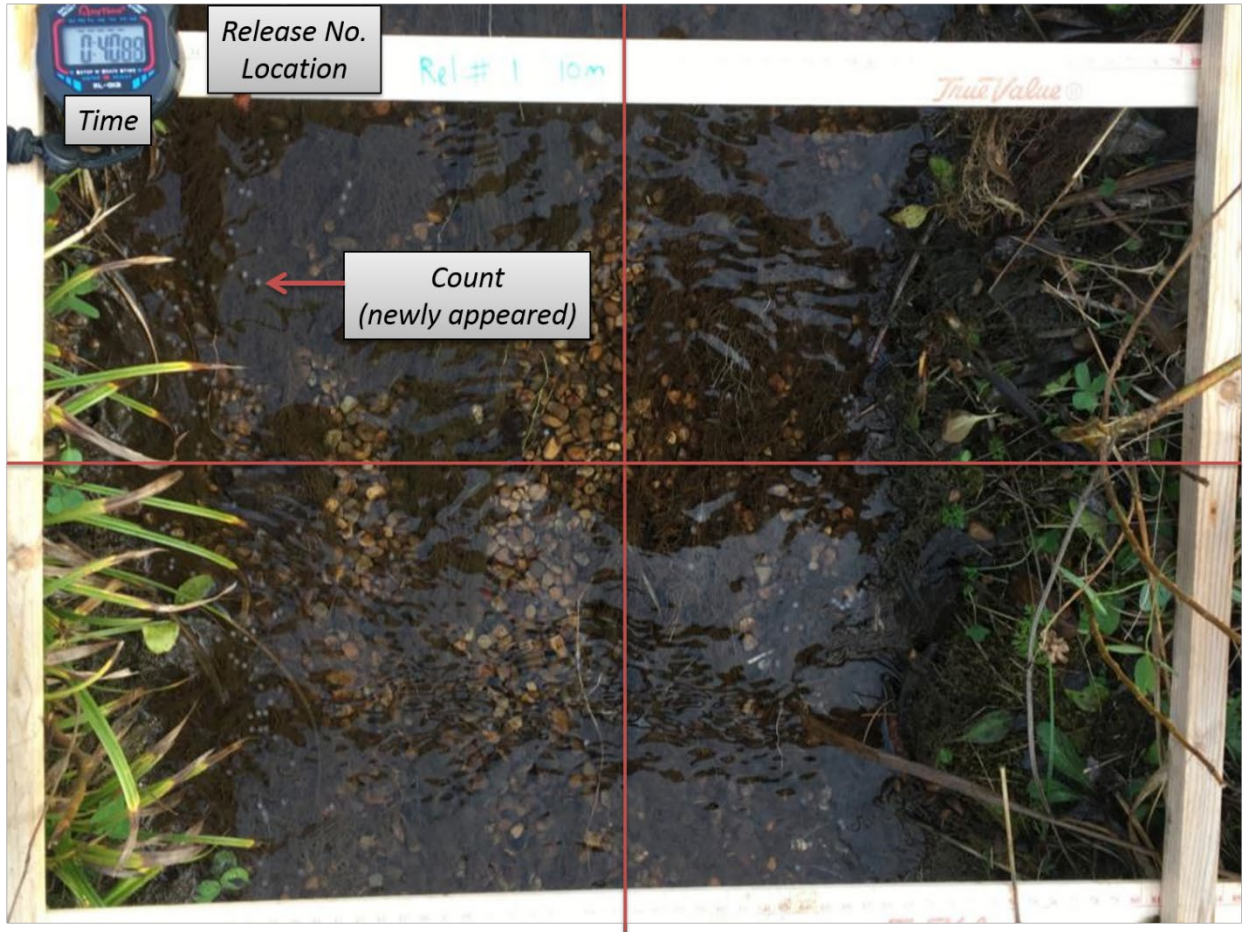

Supplemental Figure 1



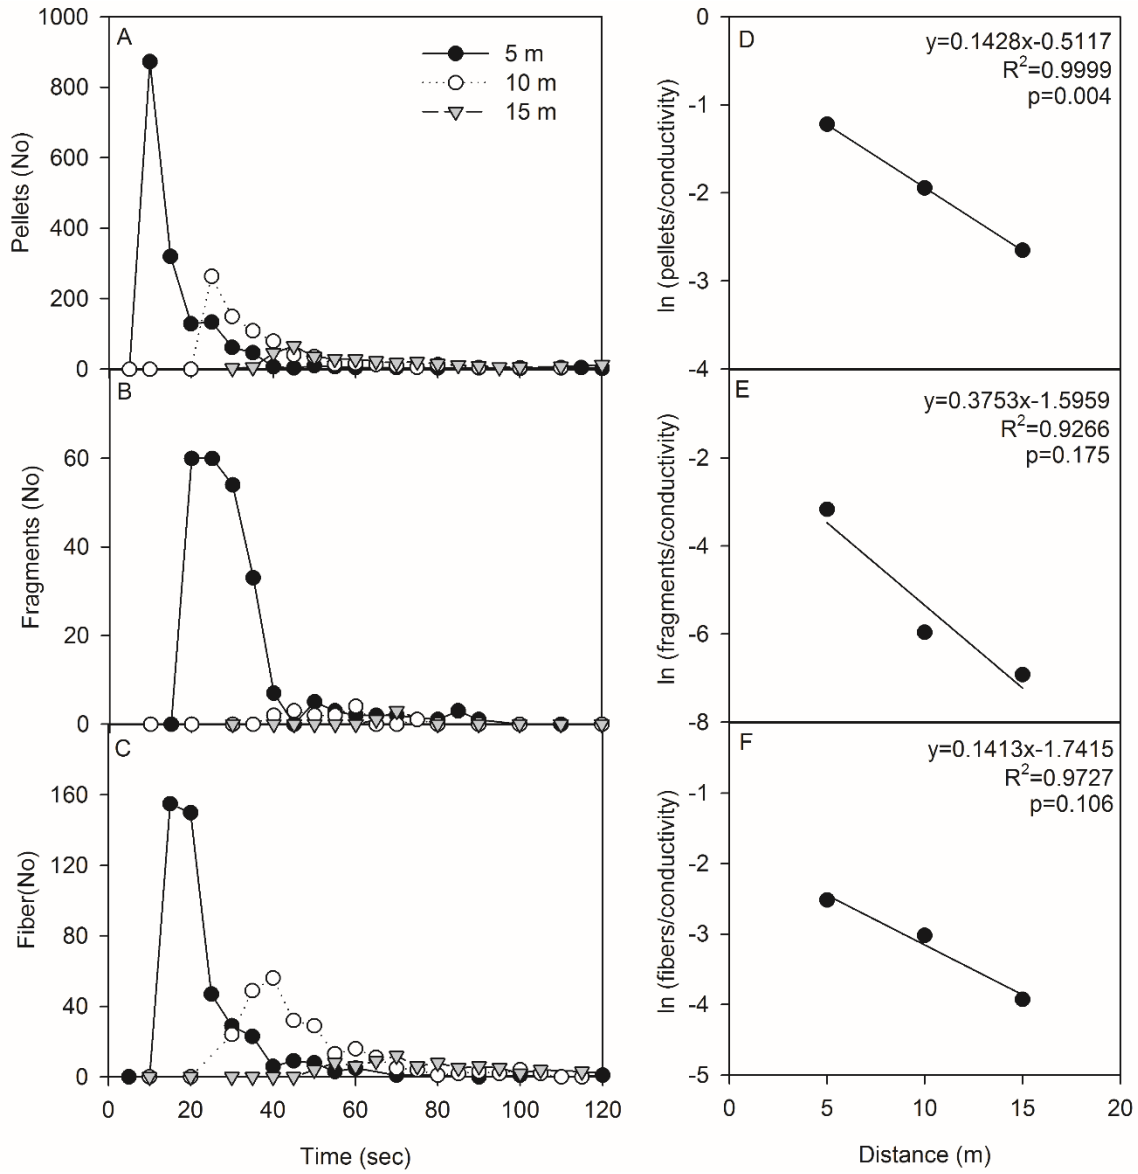

Supplemental Figure 2

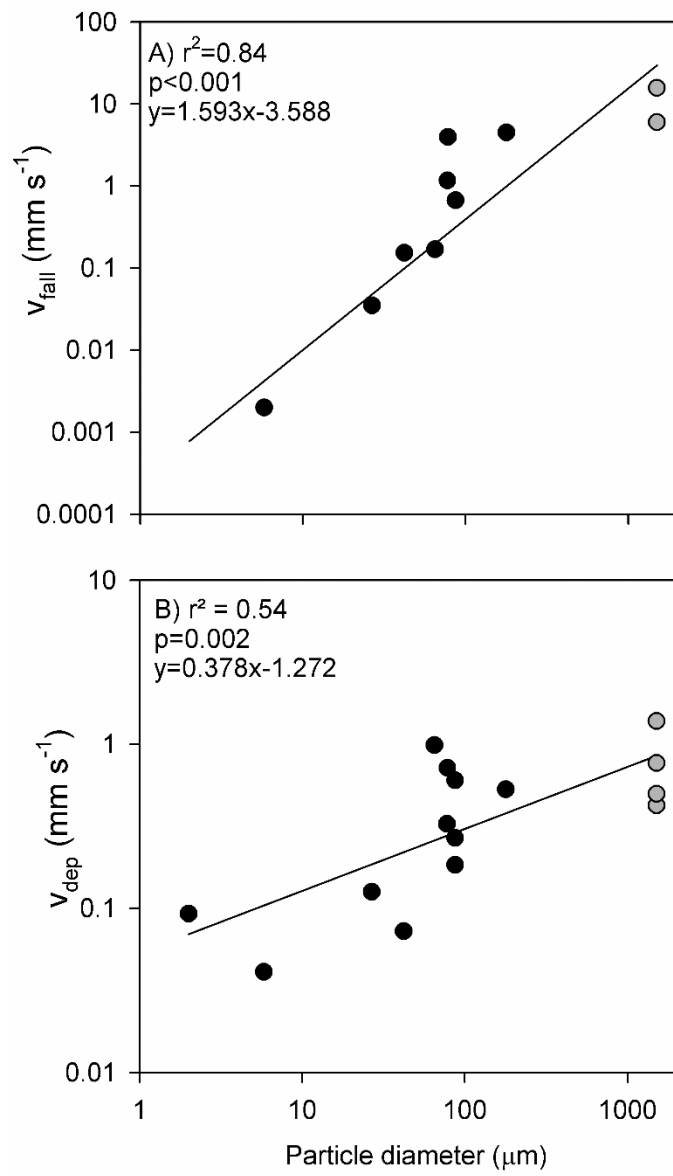

Supplemental Figure 3
